# 1 **Asymmetric adaptation reveals functional lateralization for graded versus discrete stimuli**

2 Melanie Desrochers<sup>1</sup>, Marianne Lang<sup>2</sup>, Michael Hendricks<sup>1\*</sup>

3 <sup>1</sup>Department of Biology, McGill University, Montreal, Quebec H3A 1B1, Canada

4 <sup>2</sup>École normale supérieure de Lyon

5

6 Correspondence: [michael.hendricks@mcgill.ca](mailto:michael.hendricks@mcgill.ca)

7

8

## 9 **Abstract 150 words**

10 Animal navigation strategies depend on the nature of the environmental cues used. In the  
11 nematode *Caenorhabditis elegans*, navigation has been studied in the context of gradients of  
12 attractive or repellent stimuli as well as in response to acute aversive stimuli. We wanted to  
13 better understand how sensory responses to the same stimulus vary between graded and acute  
14 stimuli, and how this variation relates to behavioral responses. *C. elegans* has two salt-sensing  
15 neurons, ASEL and ASER, that show opposite responses to stepped changes in stimulus levels,  
16 however only ASER has been shown to play a prominent role in salt chemotaxis. We used pre-  
17 exposure to natural stimuli to manipulate the responsiveness of these neurons and tested their  
18 separate contributions to behavior. Our results suggest ASEL is specialized for responses to  
19 acute stimulus changes. We also found that ASER remains responsive to graded stimuli under  
20 conditions where it is unresponsive to large steps.

21

22

## 23 **Introduction**

24 Organisms ranging from bacteria to multicellular animals use conserved navigation strategies  
25 to locate resources in their environment despite enormous differences in the specific biological  
26 implementation of these strategies. Navigation strategies are specific to the spatial or  
27 temporal features of the substances that constitute this information. One of the most common  
28 types of navigation relies on sensing and tracking gradients of diffusing substances.  
29 Depending on the shape and size of these gradients, the relevant sensors—whether they are  
30 receptors of a bacterium or axonal growth cone or the olfactory apparatus of a mammal—must  
31 continually undergo cycles of sensitization and desensitization to remain responsive to small  
32 changes in the stimulus. This is potentially challenging, because the concentration of an

33 attractant my change over orders of magnitude. At the same time, animals must remain  
34 sensitive to abrupt changes in stimuli that may require acute behavioral responses.

35 In *Caenorhabditis elegans*, salt chemotaxis has been used to dissect navigation strategies  
36 used at the genetic, cellular, circuit, and behavioral levels. The primary salt sensing neurons in  
37 *C. elegans*, ASEL and ASER, exhibit opposite responses to stepped changes in salt  
38 concentration: ASEL is activated by cations and responds to up-steps in salt concentration,  
39 while ASER detects anions and responds to down-steps (Pierce-Shimomura et al., 2001;  
40 Suzuki et al., 2008). Under most conditions, gradient chemotaxis in the nematode  
41 *Caenorhabditis elegans* can be described as a biased random walk, a strategy identical to that  
42 used by single-celled organisms like bacteria, multicellular growth processes observed in plant  
43 roots, and even subcellular structures like axonal growth cones (Berg and Brown, 1972; Pierce-  
44 Shimomura et al., 1999). While *C. elegans* does respond to salt up-steps and down-steps (Miller  
45 et al., 2005), most behavioral analysis is done in the context of gradient navigation. However,  
46 the physiological properties of ASEL and ASER are less well-explored in the context of graded  
47 stimuli. ASER shows complex calcium responses to gradients that depend both on the direction  
48 of salt change and whether salt levels are above or below a memorized cultivation  
49 concentration (Luo et al., 2014). While ASEL contributes to forward locomotion during  
50 exposure to attractive salt concentrations (Suzuki et al., 2008), ASEL has been found to be  
51 largely dispensable for both positive and negative salt gradient chemotaxis (Kunitomo et al.,  
52 2013; Luo et al., 2014), though recently it was shown that optogenetic stimulation of ASEL can  
53 drive fictive positive chemotaxis under specific conditions (Wang et al., 2017).

54 We were interested in attempting to reconcile calcium imaging experiments, usually  
55 performed using stepped stimuli, with behavioral studies that examine behavior in stimulus  
56 gradients. The increasing use of microfluidics for both calcium imaging and behavioral  
57 analysis provides an opportunity to do so (Albrecht and Bargmann, 2011; Chronis et al., 2007),  
58 though producing reproducible temporal stimulus gradients in microfluidic devices is  
59 challenging. We previously showed that gradients could be generated by coupling a mixing  
60 chamber with magnetic stir plate (Luo et al., 2014). However, this system was cumbersome and  
61 difficult to control.

62 Here, we describe a dedicated device based on the same principle that can deliver  
63 reproducible temporal gradients into microfluidic devices for both calcium imaging and  
64 behavioral experiments. We show that ASEL and ASER can be separately and selectively

65 desensitized or sensitized by pre-exposure to high or low salt concentration and use this  
66 manipulation to test the contribution of each to behavioral responses to either stepped or  
67 graded stimuli. The use of real stimuli to manipulate sensory neuron sensitivity has the  
68 advantage of not relying on artificial manipulations of neural circuit function, thus the  
69 responses and behaviors we observe all fall within the normal physiological and functional  
70 repertoire of the animal. We find that ASEL sensitization enhances behavioral responses to  
71 stepped stimuli. ASER-sensitized animals ignore large steps despite showing robust calcium  
72 responses to the stimulus. In response to graded stimuli, ASER desensitization specifically  
73 impairs response to salt increases, suggesting that even when ASEL is sensitized it is not  
74 sufficient to drive chemotaxis in our assay. Finally, we observe that under conditions in which  
75 ASER is desensitized and unresponsive to salt down-steps, it remains sensitive to negative salt  
76 gradients, exhibiting sharp, sporadic calcium events, and the probability of these events is  
77 regulated by integrating graded salt decreases over time.

78

79

## 80 **Materials and methods**

81 *Caenorhabditis elegans* were raised on nematode growth medium, 0.25% Tryptone  
82 (w/v), 1.5% Agar (w/v), 1 mM CaCl<sub>2</sub>, 1 mM MgSO<sub>4</sub>, 25 mM KPO<sub>4</sub> (pH 6.0), 50 mM NaCl, and fed  
83 with *E. coli* OP50 (Brenner, 1974; Stiernagle, 2006). Young adult hermaphrodites were used in  
84 all experiments. Strain ZC1600 [yxEx783], previously described, contains an extrachromosomal  
85 array driving expression of the genetically-encoded calcium indicator GCaMP3 under the *flp-6*  
86 promoter (Luo et al., 2014; Tian et al., 2009).

87

### 88 *Salt solutions*

89 Salt solutions were made in a buffer identical to nematode growth medium (NGM) except  
90 without agar, tryptone, or cholesterol, 1 mM CaCl<sub>2</sub>, 1 mM MgSO<sub>4</sub>, 25 mM KPO<sub>4</sub> (pH 6.0).

91

### 92 *Temporal gradient production*

93 We designed an instrument to produce temporal gradients based on rapidly mixing small  
94 volumes of two solutions off-chip prior to flowing into the stimulus channels or behavioral  
95 arena. Schematic and code used to control the device are found in Figure 3 and Supplementary  
96 Figure S1. Briefly, we made two solutions with different concentrations of salt and fluorescein

97 (to monitor the gradient) corresponding to the highest and lowest concentration for a  
98 particular stimulus sequence. Solenoid pinch valves (Neptune Research, 225P011-21)  
99 controlled the flow of these solutions into a small mixing chamber made from 0.25 inch ID  
100 tubing containing either a 7 mm magnetic stir bar or a small spherical magnet (Fisher  
101 Scientific). A larger stir bar was affixed to a 12V DC motor and the mixing chamber was  
102 positioned close to it, clamped in place with an alligator clip. Driving the motor to spin the  
103 large bar causes rapid mixing of solutions in the chamber. The DC motor and valves were  
104 controlled by an Arduino UNO R3 microprocessor (see Supplemental Figure S1). Gradient  
105 steepness and shape is a function of flow rate, mixing chamber volume, and pinch valve duty  
106 cycles. The lag between switching solutions and affecting the in-chip gradient can be reduced  
107 by positioning the mixing chamber as close as possible to the microfluidic device. Because the  
108 fluorescein salt is itself an ASE stimulus, it was used over a concentration range 4 to 6 orders of  
109 magnitude smaller than the NaCl range and in the opposite polarity, such that the highest  
110 fluorescein concentration (0.08  $\mu\text{M}$  for calcium imaging, 1  $\mu\text{M}$  for behavior) corresponded to  
111 the lowest salt concentration and vice versa.

112

### 113 *Microfluidic device fabrication*

114 Photoresist (SU8) masters for microfluidic devices were fabricated by soft lithography (San-  
115 Miguel and Lu, 2013). Polydimethylsiloxane (PDMS) (Dow Corning Sylgard 184, Ellsworth  
116 Adhesives #4019862) was mixed at 10:1, degassed, poured over masters, degassed again, and  
117 cured at 60°C for at least 3 hours. Devices were replica mastered in a two-part epoxy resin  
118 (Smooth Cast 310, Sculpture Supply Canada #796220). Inlet holes were bored with a Milltex 1  
119 mm biopsy punch (Fisher). Chips were cleaned and bonded to glass coverslips using air plasma  
120 generated by a handheld corona treater (Haubert et al., 2006) (Electro-Technic Products,  
121 Chicago, IL). Coupling to fluid reservoirs was done by directly inserting PTFE microbore tubing  
122 (Cole-Parmer #EW-06417-21) into inlet holes.

123

### 124 *Calcium imaging*

125 Fluorescence time lapse imaging was performed on an Olympus IX83 inverted microscope  
126 using a 40x silicone immersion lens. Images were captured with an OrcaFlash4.0 sCMOS  
127 camera (Hamamatsu). A piezo-controlled z-axis stage (Prior Scientific) was used for  
128 alternately imaging ASEL and ASER by rapidly switching between focal planes. Because of the



129 long time course of the experiments, animals were imaged at low illumination levels using 300  
130 ms exposures and capture each neuron at 1 Hz. Animals restrained in a microfluidic channel  
131 (Chronis et al., 2007) were exposed to the stimulus streams described in each experiment. For  
132 stepped stimuli, fluid flow was controlled with a ValveBank (AutoMate Scientific) and driven  
133 by a vacuum trap on the outflow channel. Graded stimuli were produced by the off-chip mixing  
134 device described in Figure 3, Supplemental Figure S1, and below. Fluorescence intensity was  
135 measured from neuronal soma using Fiji (Schindelin et al., 2012). For Ca<sup>2+</sup> traces and statistical  
136 analysis, fluorescence was normalized to the first 3 seconds of recording, for heat maps  
137 intensities were normalized to the minimum value for each animal.

138

### 139 *Behaviour tracking*

140 Animals were loaded into a microfluidic device based on the "pulse chip" (Albrecht and  
141 Bargmann, 2011). The chip consists of an array of posts sized and spaced to allow *C. elegans* to  
142 crawl through a fluid substrate under constant, controllable flow. For each assay 20-30  
143 animals were loaded into the microfluidic arena after pre-exposure and presented with  
144 stimulus sequences described for each experiment while being recorded with a USB camera  
145 (Logitech 210 or Dino-Lite). Fluid flow was produced by gravity. Position over time for each  
146 animal was measured with the TrackMate ImageJ plugin (Tinevez et al., 2017). Tracks shorter  
147 than 60 seconds were excluded. Frames where animals explored the chip boundary were  
148 excluded. From these coordinates, a path angle measure was extracted for each frame by  
149 calculating the angle between vectors projecting from the current animal position to future  
150 and past positions with a 5 second lag.

151

### 152 *Data analysis*

153 JMP Pro 13 (SAS) was used for statistical tests and graphs.

154

## 155 **Results and Discussion**

156 Sensory systems adapt based on a recent experience. Sensitization is expected to occur when  
157 stimulus levels are low, and desensitization is expected with high stimulus levels. Because  
158 ASEL and ASER respond to salt steps of opposite valence, high or low salt concentrations  
159 should have opposing effects on adaptation in these two neurons. We explored the effects of  
160 prior exposure to higher or lower salt on ASER and ASEL calcium responses by removing

161 animals from food and washing them in a buffer containing either 0 mM or 50 mM NaCl for 15  
162 or 60 minutes (Figure 1A).

163 Animals expressed the genetically-encoded calcium indicated GCaMP3 in both ASE  
164 neurons. After pre-exposure, animals were loaded into a microfluidic device that exposes the  
165 nose of restrained animals to alternating fluid streams (Chronis et al., 2007). We recorded  
166 GCaMP fluorescence intensity in ASER and ASEL while animals were exposed to 50 mM steps  
167 in salt concentration. We observed the well-characterized ON (ASEL) and OFF (ASER)  
168 properties of the two neurons in response to stepped stimuli, however we found that their  
169 responses were dramatically altered by pre-exposure to high or low salt concentrations  
170 (Figure 1B-E). ASEL, which responds to salt upsteps (Suzuki et al., 2008), showed minimal  
171 responses to a 50 mM upstep in salt concentration when animals were pre-exposed to high salt  
172 (adaptation), but large responses when pre-exposed to a salt-free buffer (sensitization). ASER  
173 exhibited the opposite pattern of adaptation/sensitization. Both short (15 minute) and long (60  
174 minute) pre-exposures had similar effects (Figure 1F,G).

175 We reasoned that this asymmetric effect could be used to test the contribution of each  
176 of these neurons on behavioral responses to subsequent stimuli. Animals were exposed to  
177 alternating pulses of high and low salt solutions in a microfluidic arena (Albrecht and  
178 Bargmann, 2011). We used a simple measure of path geometry to quantify behavioral responses  
179 (Pradhan et al., 2018) (Figure 2A). Lower path angles indicate forward crawling, associated  
180 with preference for a stimulus; high path angles are associated with frequent reversals, turns,  
181 and slower locomotion, behaviors typically associated with avoidance.

182 Animal pre-exposed to NaCl-free buffer showed robust behavioral responses to  
183 alternating pulses of 0 mM and 50 mM salt solutions, exhibiting reduced path angles in the  
184 preferred, high salt solution and lower path angles in the low salt solution (Figure 1B). This  
185 corresponded to changes in reversal frequency (Figure 1C) and speed (Figure 1D). In contrast,  
186 animals pre-exposed to 50 mM salt showed no behavioral responses to salt steps between 0  
187 mM and 50 mM (Figure 2E-G). Thus, selective sensitization of ASEL renders animals  
188 behaviorally responsive to large salt steps, while sensitization of ASER and desensitization of  
189 ASEL results in animals that ignore these steps (Figure 1H).

190 We next wanted to compare how selective sensitization affected responses to graded  
191 stimuli. We designed a compact instrument that controlled fluid flow into microfluidic devices  
192 and included a low-volume, in-line mixing chamber, in which a small magnetic stir bar is

193 driven by a larger magnet attached to a DC motor (Figure 1A). The valves and motor were  
194 controlled by an Arduino microcontroller (see Materials and Methods and Supplemental Figure  
195 S1). This device allows the production of reproducible temporal gradients flowing through the  
196 chip.

197 We first tested how pre-exposure affected ASEL and ASER responses to graded stimuli.  
198 We observed that sensitization / desensitization relationships were overall like those for  
199 stepped stimuli. Pre-exposure to 100 mM NaCl produced robust and sustained ASER calcium  
200 activity in response to negative gradients and highly attenuated, if any, ASEL responses  
201 (Figure 3B). Pre-exposure to 0 mM NaCl led to robust ASEL activity in response to positive  
202 gradients. Unlike in the stepped-stimulus assay, however, we also observed ASER responses to  
203 negative gradients—salt decreases—after this treatment (Figure 3C).

204 To quantify neuronal responses relative to the gradient, we plotted mean GCaMP  
205 intensity relative to recent (30 seconds) net estimated changes in salt concentration (Figure  
206 3D, upper panels) and measured the paired difference for each animal between responses to  
207 negative and positive gradients (Figure 3D, lower panels). These findings were consistent with  
208 stepped stimuli. However, the short, sporadic responses observed in ASER after 0 mM pre-  
209 exposure are not well-captured by an analysis of fluorescence averaged over time. We decided  
210 to quantify these as discrete events by detecting local maxima preceded by high rates of  
211 intensity increase (Figure 3E). We then calculated the probability of these events relative to  
212 amplitude gradient direction (Figure 3F) and found that these events, like sustained responses,  
213 are regulated by recent stimulus history.

214 We next generated temporal gradients within the behavioral microfluidic device. Here,  
215 results were quite different from those using stepped stimuli. Pre-exposure to 0 mM or 100  
216 mM NaCl did not affect the ability to adjust behavior in response to a negative salt gradient,  
217 indicated by a steadily increasing path angle (Figure 3G, left). In contrast, pre-exposure did  
218 influence the ability to respond to negative salt gradients, with animals pre-exposed to 100  
219 mM showing path angle decreases and those exposed to 0 mM showing no change (Figure 3G,  
220 right).

221 Together, these results suggest that ASEL and ASER are specialized for stepped versus  
222 graded salt stimuli, respectively, and this may explain the lack of any role for ASEL in most salt  
223 chemotaxis assays. When ASEL is sensitized, animals show robust changes in locomotion in  
224 response to abrupt switches between high and low salt solutions. When ASER activity

225 predominates and ASEL is attenuated, animals ignore these switches. Gradients are more  
226 complex. ASEL is not sufficient on its own to mediate positive gradient chemotaxis, as only  
227 animals pre-exposed to 100 mM NaCl (ASER-sensitized) show behavioral responses. However,  
228 both ASEL- and ASER-sensitized animals can navigate in response to a negative temporal  
229 gradient. We suggest that this is because, despite ASER being unresponsive to stepped stimuli  
230 after 0 mM pre-exposure, it remains responsive to graded stimuli through a different mode of  
231 activity characterized by sharp, discrete calcium events rather than long sustained calcium  
232 waves.

233 While it is ideal to measure activity and behavior at the same time, this is often not  
234 possible, and precisely controlling stimuli is difficult in freely-moving animals. With the  
235 exception of temperature, the attention paid to *C. elegans* behavior to stimulus gradients has  
236 not been matched by analysis of neural responses to graded stimuli, and it is clear there are  
237 important differences in responses to graded versus stepped stimuli (Itskovits et al., 2018;  
238 Larsch et al., 2015; Luo et al., 2014). Our approach overcomes this technical barrier to allow  
239 easy analysis of neuronal responses to gradients. We also show that ASER shows strikingly  
240 different patterns of activity depending on stimulus regimen and prior exposure. It was  
241 recently reported that the AWA olfactory sensory neuron also exhibits diverse physiological  
242 modes depending on context (Liu et al., 2018). These observations, combined with our use of  
243 natural stimuli to manipulate sensory responses, underscore the need to analyze neuronal  
244 function across their physiological ranges in response to natural stimuli in order to understand  
245 sensorimotor transformations.

246  
247

## 248 **Acknowledgements**

249 We thank Xinyu Liu and Xianke Dong (McGill University) for providing photoresist masters for  
250 microfluidic devices. We thank all members of the lab for helpful discussions and comments.  
251 Some strains were provided by the Caenorhabditis Genetics Center (CGC), which is funded by  
252 NIH Office of Research Infrastructure Programs (P40 OD010440).

253

## 254 **Competing Interests**

255 The authors declare that they have no competing interests.

256

257 **Author Contributions**

258 M.D. and M.H. designed the gradient instruments. All authors designed experiments, M.D. and  
259 M.L. conducted experiments. All authors analyzed the data. M.D. and M.H. wrote the  
260 manuscript.

261

262 **Funding**

263 This work was supported by funding from McGill University, the National Science and  
264 Engineering Research Council (NSERC) (RGPIN/05117-2014), the Canadian Foundation for  
265 Innovation (CFI) (32581), and the Canada Research Chairs Program (950-231541).

266

267 **Albrecht, D. R. and Bargmann, C. I.** (2011). High-content behavioral analysis of *Caenorhabditis*  
268 *elegans* in precise spatiotemporal chemical environments. *Nat. Methods* **8**, 599–605.

269 **Berg, H. C. and Brown, D. A.** (1972). Chemotaxis in *Escherichia coli* analysed by three-  
270 dimensional tracking. *Nature* **239**, 500–504.

271 **Brenner, S.** (1974). The Genetic of *Caenorhabditis elegans*. *Genetics* **77**, 71–94.

272 **Chronis, N., Zimmer, M. and Bargmann, C. I.** (2007). Microfluidics for in vivo imaging of  
273 neuronal and behavioral activity in *Caenorhabditis elegans*. *Nat. Methods* **4**, 727–731.

274 **Haubert, K., Drier, T. and Beebe, D.** (2006). PDMS bonding by means of a portable, low-cost  
275 corona system. *Lab Chip* **6**, 1548–1549.

276 **Itskovits, E., Ruach, R. and Zaslaver, A.** (2018). Concerted pulsatile and graded neural  
277 dynamics enables efficient chemotaxis in *C. elegans*. *Nat. Commun.* **9**, 2866.

278 **Kunitomo, H., Sato, H., Iwata, R., Satoh, Y., Ohno, H., Yamada, K. and Iino, Y.** (2013).  
279 Concentration memory-dependent synaptic plasticity of a taste circuit regulates salt  
280 concentration chemotaxis in *Caenorhabditis elegans*. *Nat. Commun.* **4**, 2210.

281 **Larsch, J., Flavell, S. W., Liu, Q., Gordus, A., Albrecht, D. R. and Bargmann, C. I.** (2015). A  
282 Circuit for Gradient Climbing in *C. elegans* Chemotaxis. *Cell Rep.* **12**, 1748–1760.

283 **Liu, Q., Kidd, P. B., Dobosiewicz, M. and Bargmann, C.** (2018). The *C. elegans* AWA Olfactory  
284 Neuron Fires Calcium-Mediated All-or-None Action Potentials. *bioRxiv*.

285 **Luo, L., Wen, Q., Ren, J., Hendricks, M., Gershow, M., Qin, Y., Greenwood, J., Soucy, E. R.,**  
286 **Klein, M., Smith-Parker, H. K., et al.** (2014). Dynamic encoding of perception, memory,  
287 and movement in a *C. elegans* chemotaxis circuit. *Neuron* **82**, 1115–1128.

288 **Miller, A. C., Thiele, T. R., Faumont, S., Moravec, M. L. and Lockery, S. R.** (2005). Step-  
289 response analysis of chemotaxis in *Caenorhabditis elegans*. *J. Neurosci.* **25**, 3369–3378.

290 **Pierce-Shimomura, J. T., Morse, T. M. and Lockery, S. R.** (1999). The fundamental role of

- 291 pirouettes in *Caenorhabditis elegans* chemotaxis. *J. Neurosci.* **19**, 9557–9569.
- 292 **Pierce-Shimomura, J. T., Faumont, S., Gaston, M. R., Pearson, B. J. and Lockery, S. R.** (2001).  
293 The homeobox gene *lim-6* is required for distinct chemosensory representations in *C.*  
294 *elegans*. *Nature* **410**, 694–698.
- 295 **Pradhan, S., Quilez, S., Homer, K. and Hendricks, M.** (2018). Environmental programming of  
296 adult foraging behavior in *C. elegans*. *bioRxiv* 400754.
- 297 **San-Miguel, A. and Lu, H.** (2013). Microfluidics as a tool for *C. elegans* research. *WormBook* 1–  
298 19.
- 299 **Schindelin, J., Arganda-Carreras, I., Frise, E., Kaynig, V., Longair, M., Pietzsch, T., Preibisch,**  
300 **S., Rueden, C., Saalfeld, S., Schmid, B., et al.** (2012). Fiji: an open-source platform for  
301 biological-image analysis. *Nat. Methods* **9**, 676–682.
- 302 **Stiernagle, T.** (2006). Maintenance of *C. elegans*. *WormBook* 1–11.
- 303 **Suzuki, H., Thiele, T. R., Faumont, S., Ezcurra, M., Lockery, S. R. and Schafer, W. R.** (2008).  
304 Functional asymmetry in *Caenorhabditis elegans* taste neurons and its computational role  
305 in chemotaxis. *Nature* **454**, 114–117.
- 306 **Tian, L., Hires, S. A., Mao, T., Huber, D., Chiappe, M. E., Chalasani, S. H., Petreanu, L.,**  
307 **Akerboom, J., McKinney, S. A., Schreiter, E. R., et al.** (2009). Imaging neural activity in  
308 worms, flies and mice with improved GCaMP calcium indicators. *Nat. Methods* **6**, 875–881.
- 309 **Tinevez, J.-Y., Perry, N., Schindelin, J., Hoopes, G. M., Reynolds, G. D., Laplantine, E.,**  
310 **Bednarek, S. Y., Shorte, S. L. and Eliceiri, K. W.** (2017). TrackMate: An open and extensible  
311 platform for single-particle tracking. *Methods* **115**, 80–90.
- 312 **Wang, L., Sato, H., Satoh, Y., Tomioka, M., Kunitomo, H. and Iino, Y.** (2017). A Gustatory  
313 Neural Circuit of *Caenorhabditis elegans* Generates Memory-Dependent Behaviors in Na+  
314 Chemotaxis. *J. Neurosci.* **37**, 2097–2111.

## FIGURE 1

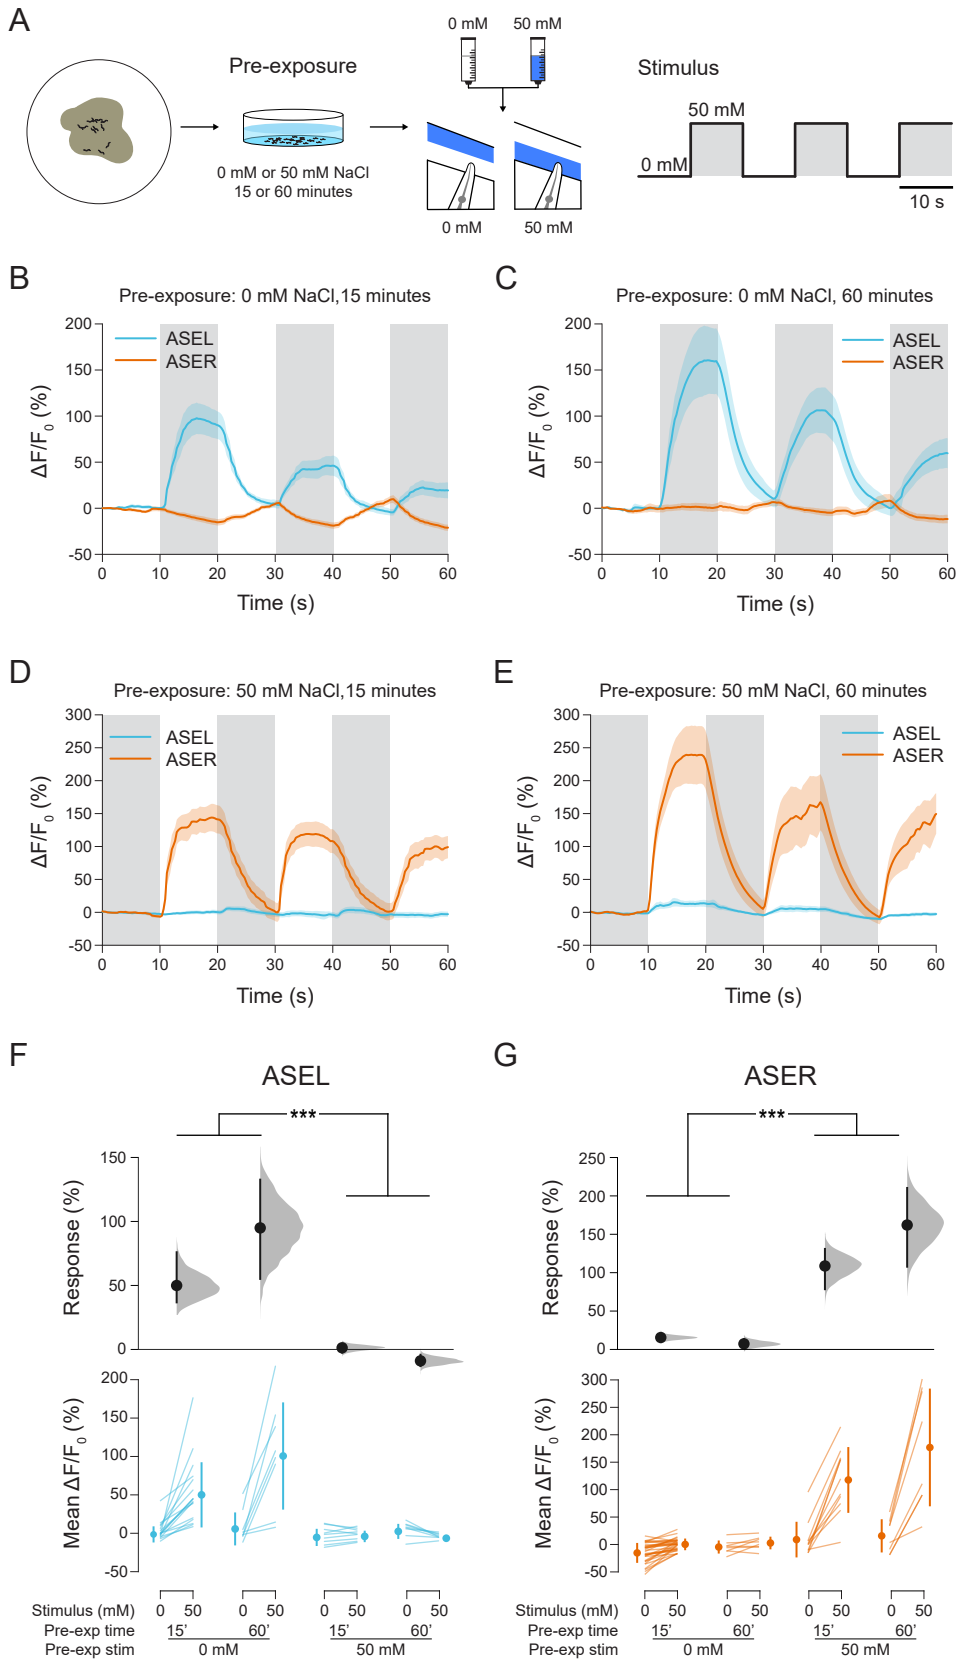



## Figure Legends

**Figure 1. Modulating ASEL and ASER responsiveness with stimulus pre-exposure.** (A) Animals were raised under standard conditions. Prior to calcium imaging, animals were washed in a solution containing either 0 mM or 50 mM NaCl for 15 or 60 minutes prior to imaging. (B) Pre-exposure to 0 mM NaCl attenuates ASER responses, while ASEL shows robust ON responses. (C) Longer pre-exposure increases ASEL response magnitude. (D) Pre-exposure to 50 mM NaCl attenuates ASEL responses while ASER shows strong OFF response. (E) One hour of pre-exposure increases ASER responses. (F) Comparison of mean fluorescence intensity in the 5 second time windows shown in yellow in (A) by pre-exposure condition and stimulus in ASEL. (G) Comparison of mean fluorescence intensity in the 5 second time windows shown in yellow in (A) by pre-exposure condition and stimulus in ASER. Sample size for each condition left to right ASEL/ASER n = 17/33, 8/8, 9/11, 8/8. A two-way ANOVA to test the effects of pre-exposure condition and time on response magnitude was significant for ASEL ( $F_{3,38} = 13.3386$ ,  $P < 0.0001$ , significant main effect of condition  $P < 0.0001$ ) and ASER ( $F_{3,56} = 45.7473$ ,  $P < 0.0001$ , significant main effect of condition  $P < 0.0001$ ). Pre-exposure time was not significant. \*\*\* $P < 0.001$ , post-hoc Student's t-test.



**Figure 2. Behavioral responses to pulsed stimuli are affected by pre-exposure.** (A) Animals were raised and subjected to pre-exposure conditions as in Figure 1 then loaded into a microfluidic arena where they were exposed to alternating stimulus steps of 0 mM and 50 mM NaCl in buffer. Behavior was quantified by measuring the speed and path angle of each animal (see Methods). A path angle  $< 10^\circ$  was defined as a reversal. (B–D) Animals pre-exposed to 0 mM NaCl showed robust behavioral responses to steps between 0 mM and 50 mM NaCl in path angle, reversal state probability, and speed. (E–G) Animals pre-exposed to 50 mM NaCl showed no behavioral responses to step stimuli. Traces are mean and shading is standard error. (H) Quantification of traces shown in (B–G) showing distribution (kernel density estimation), quartiles, and points corresponding to each track. Means for each measurement were determined for each track over a 20-second time window corresponding to the yellow boxes in (A). For tracks spanning more than one window, a single mean over multiple windows was calculated.  $***P < 0.001$  Student's t-test. Because of tracking errors, collisions, and edge encounters, sample size varies over the course of the experiment. For 50 mM pre-exposure,  $n = 142–193$ , for 0 mM pre-exposure,  $n = 126–181$ .

## FIGURE 3

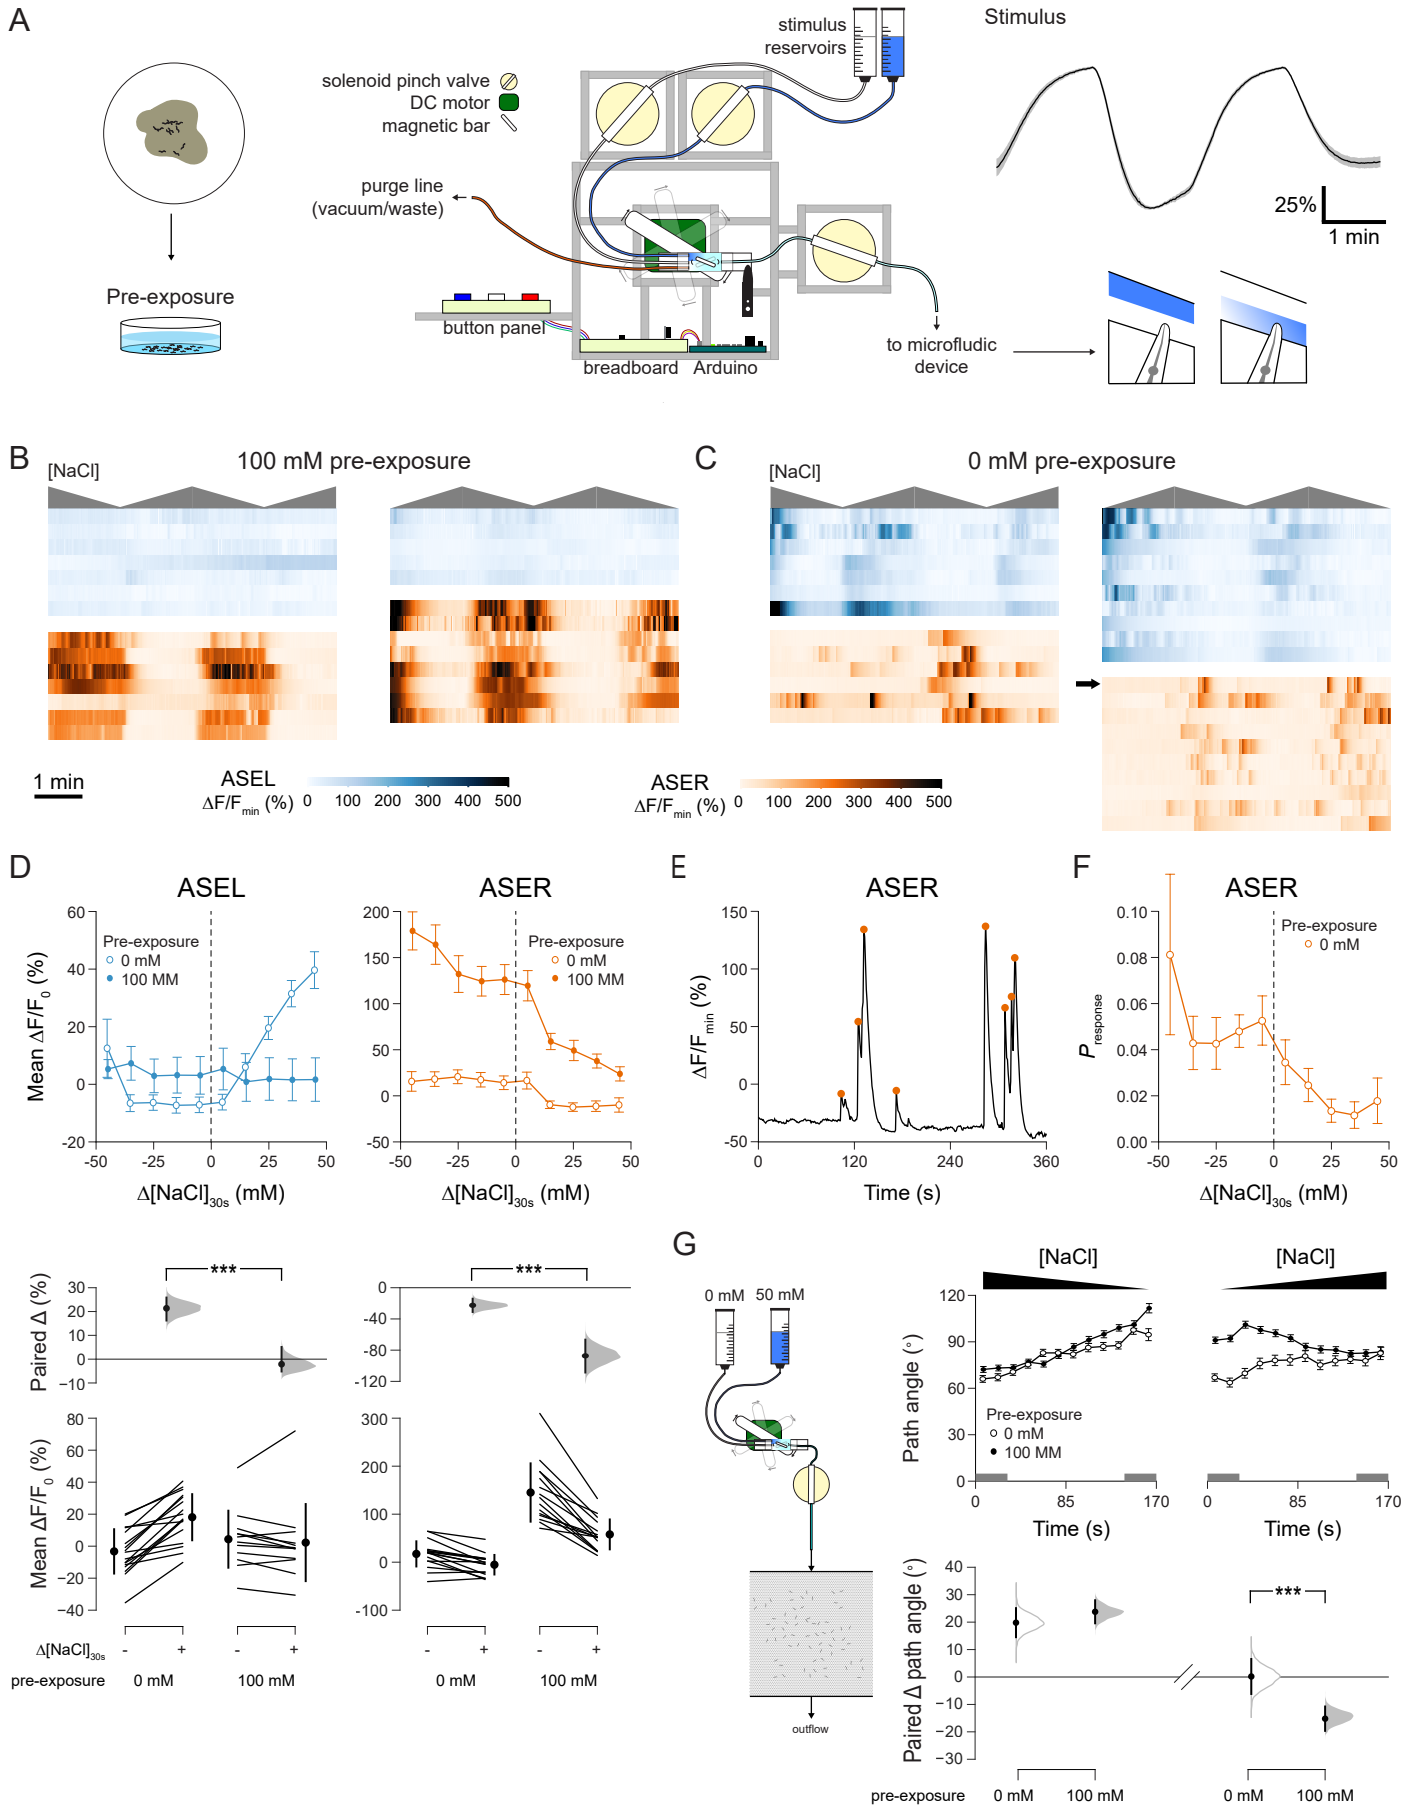

**Figure 3. Generation of temporal gradients.** (A) Two solenoid valves control the flow of solutions representing the minimum and maximum salt concentration into a mixing chamber. A magnetic stir bar spun by a DC motor drives a small stir bar in the mixing chamber. The mixed solution flows out to a microfluidic device. The valves and motor are controlled with a button interface through a programmable microcontroller (see Methods, Supplemental Figure 1). An example of gradient produced by the machine are shown at right, shading is standard error ( $n = 15$ ). (B) Calcium responses of ASEL (top) and ASER (bottom) to graded stimuli shown as heat maps, gray indicates direction of the salt gradient. (D) Mean GCaMP intensity as a function of the net change in NaCl concentration over the past 30 seconds in ASEL (left) and ASER (right). Responses for each animal in response to positive or negative changes are shown below as estimates of the mean difference (Paired  $\Delta$ , distribution of estimated mean with measured mean and 95% confidence interval) and paired plots (individual measurements, mean and standard deviation). Whether the change in NaCl over the preceding 30 seconds was positive or negative was a significant effect on paired responses for ASEL and ASER. Repeated measures ANOVA, ASEL  $F_{1,27} = 35.0174$ ,  $P < 0.0001$ , ASER  $F_{1,29} = 29.5345$ ,  $P < 0.0001$ . (E) Example of calcium events seen in ASER after pre-exposure to 0 mM NaCl. Orange dots indicate "responses" scored as local maxima occurring after high rates of intensity increase (see methods). (F) Relationship between change in NaCl over the previous 30 seconds and probability of a response, as defined in (E). Gradient direction was a significant effect on response probability. ANOVA  $F_{1,30} = 14.1617$ ,  $P = 0.0007$ . (G) Imaging behavior in response to temporal gradients. Changes in mean path angle over time periods of salt decrease (left) and salt increase (right). Mean paired changes in path angle according to pre-exposure treatment (below). Gray shading on time axis indicates time windows used for comparison. \*\*\* $P < 0.001$  paired t-test.

# Supplemental Figure S1

A

```

void setup() {
  pinMode(pinButtonTWO, INPUT);
  pinMode (valveONE, OUTPUT);
  pinMode (valveTWO, OUTPUT);
  pinMode(pinButton, INPUT);
  pinMode(motor, OUTPUT);
  pinMode (pinButtonTHREE, OUTPUT);
  pinMode (valveTHREE, OUTPUT);
}

void setup() {
  pinMode(pinButtonTWO, INPUT);
  pinMode (valveONE, OUTPUT);
  pinMode (valveTWO, OUTPUT);
  pinMode(pinButton, INPUT);
  pinMode(motor, OUTPUT);
  pinMode (pinButtonTHREE, OUTPUT);
  pinMode (valveTHREE, OUTPUT);
}

void loop() {
  statebuttonTWO=digitalRead(pinButtonTWO);
  if (statebuttonTWO == HIGH && previousTWO == LOW && millis()- timetwo > debounceTWO) {
  if (stateValve == HIGH) {
  stateValve = LOW;
  } else {
  stateValve = HIGH;
  }
  time = millis();
  }
  digitalWrite(valveONE, stateValve);
  digitalWrite(valveTWO, stateValve);
  digitalWrite(valveTHREE, stateValve);
  previousTWO == statebuttonTWO;
  statebutton=digitalRead(pinButton);
  if (statebutton == HIGH && previous == LOW && millis()- time > debounce) {
  stateMotor = stateMotor + 50;
  if (stateMotor > 200) {
  stateMotor = 0;
  }
  time = millis();
  }
  analogWrite(motor, stateMotor);
  previous == statebutton;
  statebuttonTHREE=digitalRead(pinButtonTHREE);
  if (statebuttonTHREE == HIGH && previousTHREE == LOW && millis()- timethree > debounceTHREE) {
  if (stateValveTwo == HIGH) {
  stateValveTwo = LOW;
  } else {
  stateValveTwo = HIGH;
  }
  time = millis();
  }
  digitalWrite(valveTHREE, stateValve);
  previousTWO == statebuttonTWO;
  }
  }
  
```

B

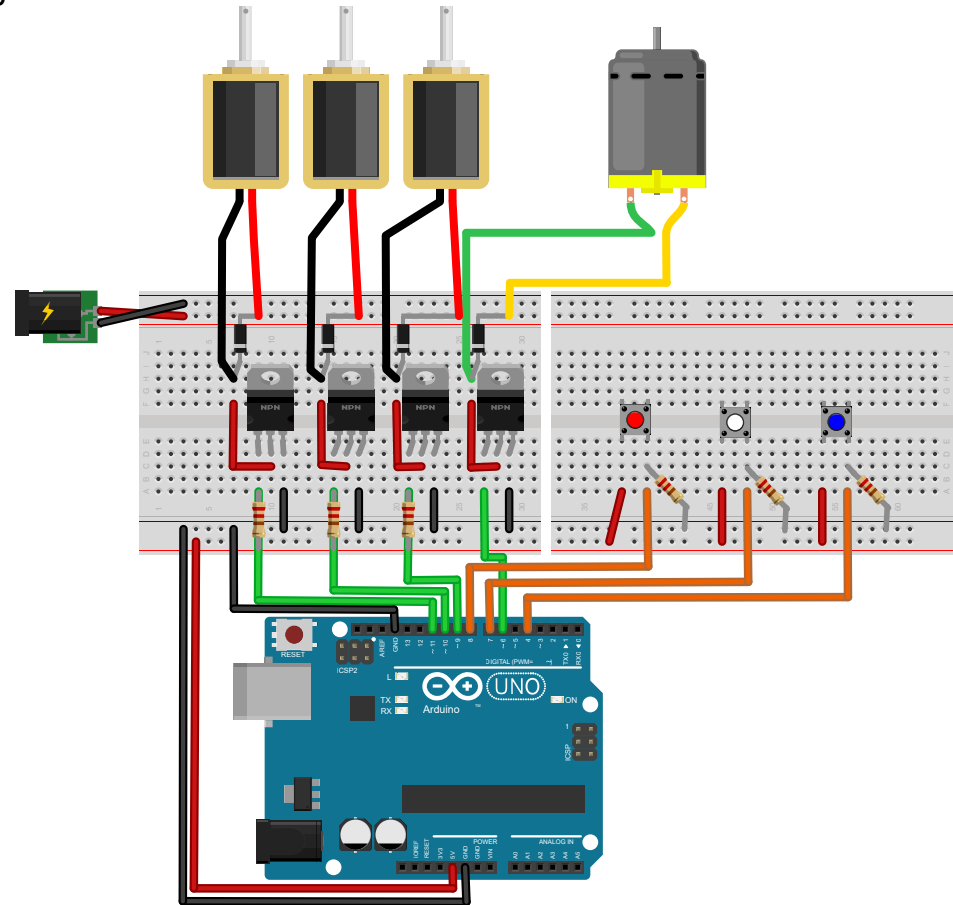

Source: https://www.biorxiv.org/content/10.1101/411033v1.full.pdf
